# Supplementary material for: Removal and recycling of ppm levels of methylene blue from an aqueous solution with graphene oxide
Source: Royal Society of Chemistry journal article supplement (doi:10.1039/c4ra16982d), 2015-01-01
Supplement: c4ra16982d1.pdf [file c4ra16982d1.pdf]

## Supporting Information

# Removal and recycling of ppm level methylene blue from aqueous solution with graphene oxide

*Saijie Song<sup>a,b</sup>, Yufei Ma<sup>\*a</sup>, He Shen<sup>a</sup>, Mengxin Zhang<sup>a,b</sup>, and Zhijun Zhang<sup>\*a</sup>*

<sup>a</sup>Key Laboratory of Nano-Bio Interface, Division of Nanobiomedicine, Suzhou Institute of Nano-Tech and Nano-Bionics, Chinese Academy of Sciences, Suzhou 215123, China

<sup>b</sup>University of Chinese Academy of Sciences, 19(A) Yuquan Road, Beijing, 100039, China

**\* Corresponding Authors.**

Fax: 86-512-62603079; Tel: 86-512-62872556;

E-mails: yfma2012@sinano.ac.cn (Y. Ma), zjzhang2007@sinano.ac.cn (Z. Zhang).

**Number of pages: 15**

**Number of figures: 13**

**Number of tables: 1**

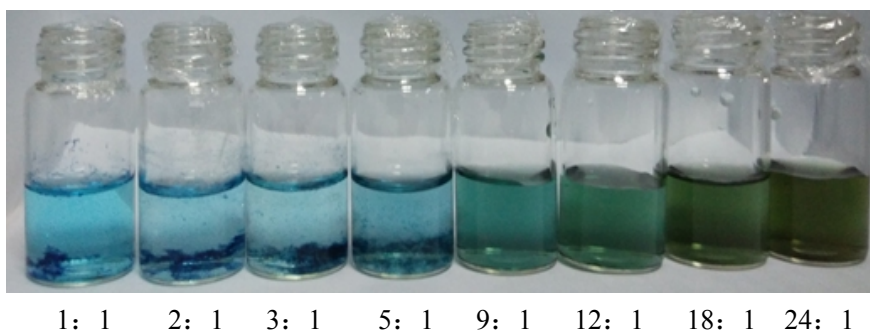

**Fig S1.** Removal of MB by GO with different ratio of GO/MB (mass concentration). All the samples were kept quietly after vigorous agitation at 1000 rpm for 30 s.

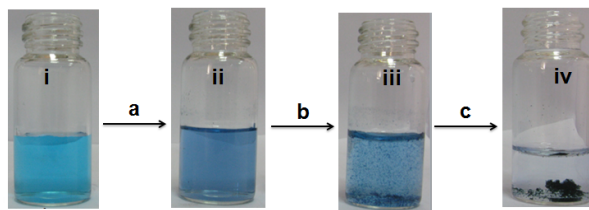

**Fig S2.** Adsorption of MB (5 ppm) by GO (15 ppm), with the presence of NaCl (5 mM). (i) MB (5ppm); (ii) MB (5 ppm) and GO (15 ppm) with NaCl (5 mM); (iii) a mass of small particulates; (iv) precipitate and colorless solution; process a: adding NaCl and GO; process b: fast stirring for 30s; process c: kept quietly for 2 days.

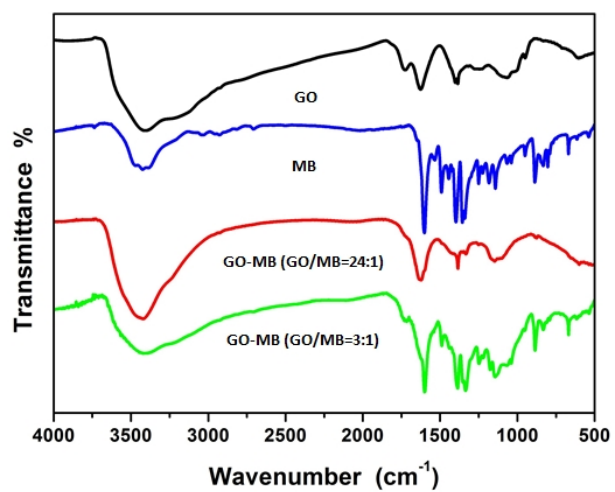

**Fig S3.** FTIR spectra of GO/MB precipitates with a different ratio of GO to MB.

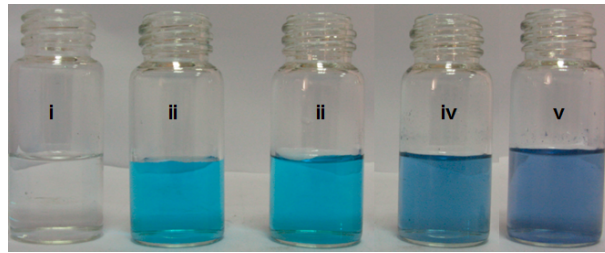

**Fig S4.** (i) D.I. water; (ii) MB (5 ppm); (iii) MB (5 ppm) with NaCl (5 mM) at pH 11.0; (iv) MB (5 ppm) with GO (15 ppm) and NaCl (5 mM) at pH 7.0; (v) MB (5 ppm) with GO (15 ppm) and NaCl (5 mM) at pH 11.0, the solution color turns to bluish violet.

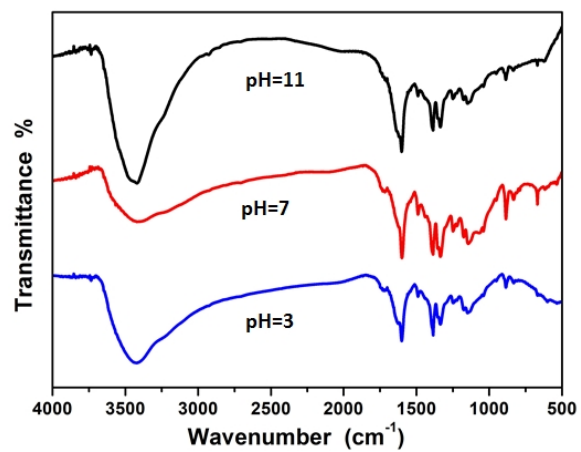

**Fig S5.** FTIR spectra of GO-MB residues formed at pH 3, 7, and 11.

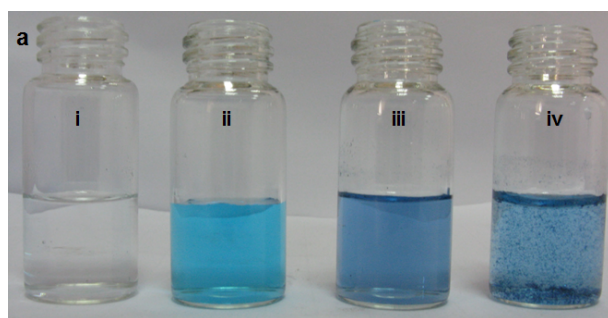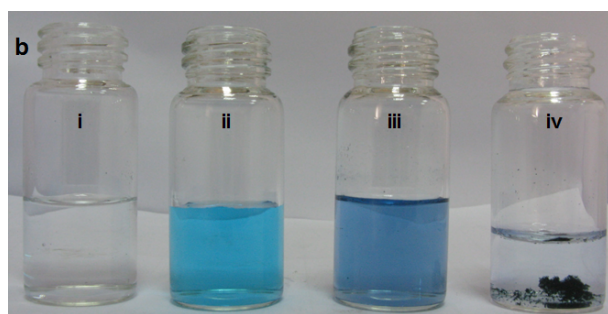

**Fig S6.** (a) Vigorous stirring (1000 rpm) for 30s (b) and then kept quietly for 2 days. (i) D.I. water; (ii) MB (5 ppm); (iii) MB (5 ppm) and GO (15 ppm), without NaCl; (iv) MB (5 ppm) and GO (15 ppm) with NaCl (5 mM).

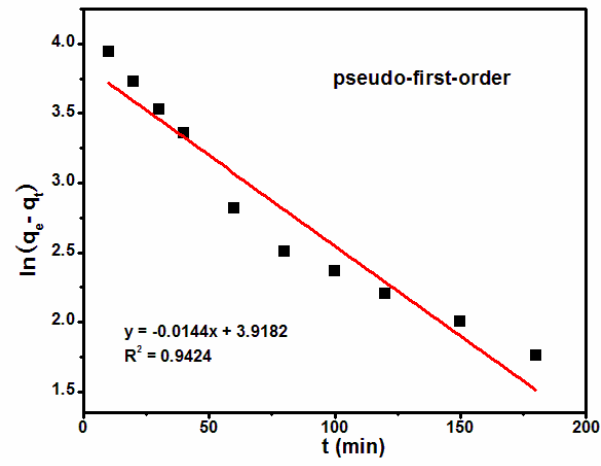

**Fig S7.** The linear plots of  $\ln(q_e - q_t)$  vs.  $t$  for MB adsorbed on GO.



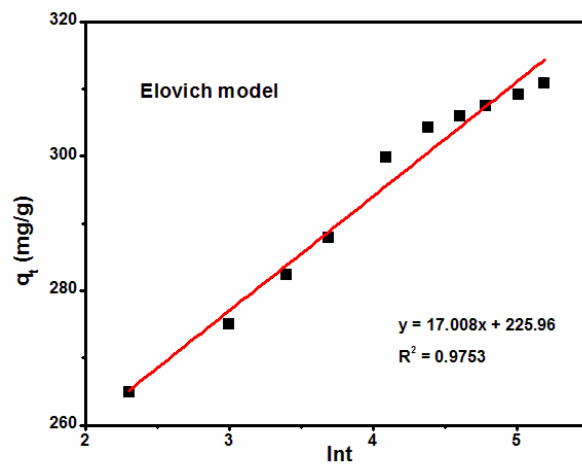

**Fig S8.** The linear plots of  $q_t$  vs.  $\ln t$  for MB adsorbed on GO.

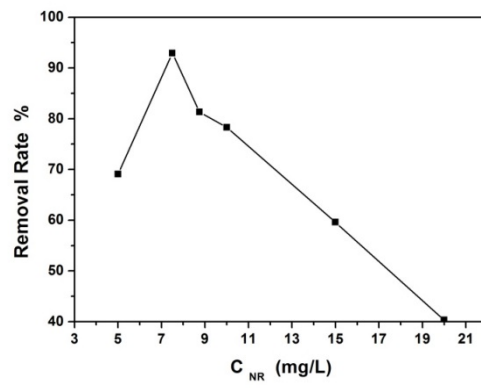

**Fig S9.** The plot of the removal rate of NR (5-20 mg/L) by GO (11.2 mg/L).

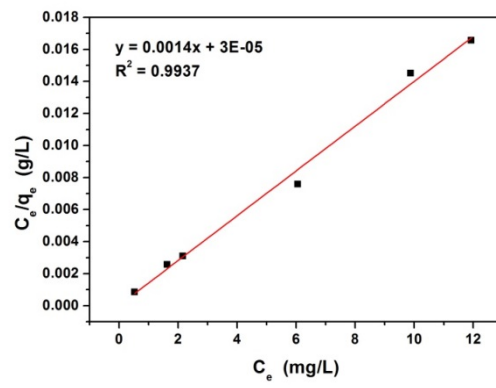

**Fig S10.** The Langmuir isotherm for NR on GO.

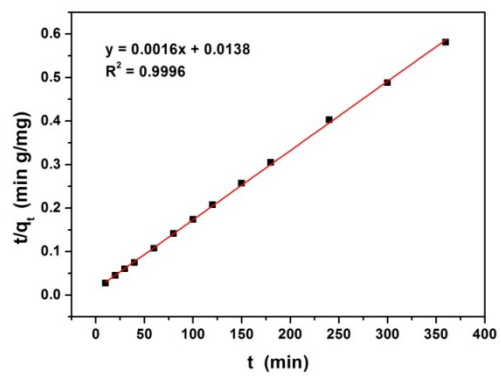

**Fig S11.** The pseudo-second-order kinetic plot for NR on GO.

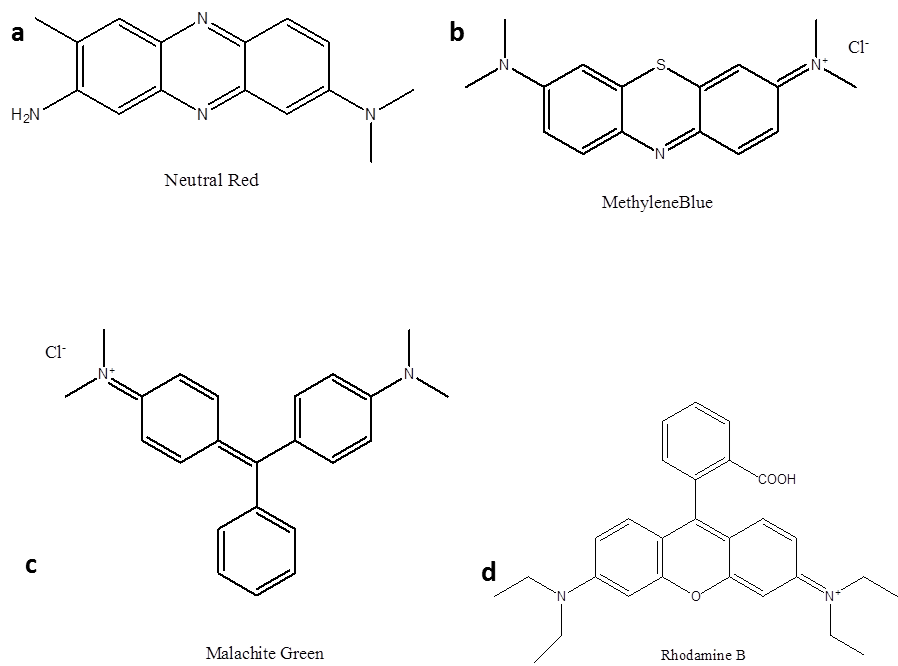

**Fig S12.** The structure of (a) NR, (b) MB, (c) MG, and (d) Rh B.

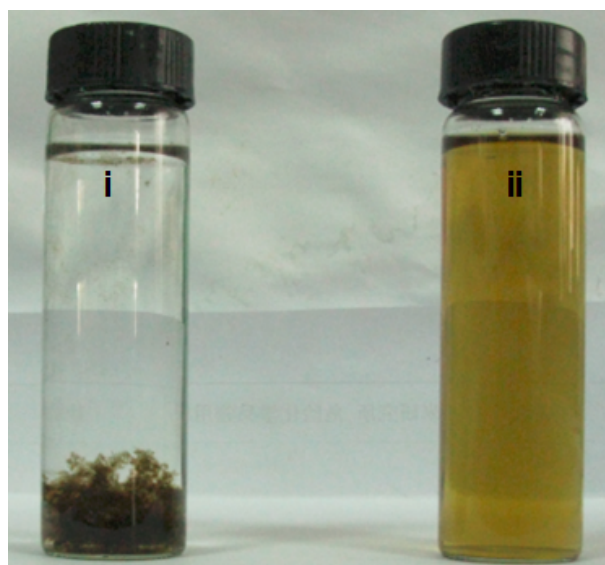

**Fig S13.** Photo of GO in nature water, a mass of precipitate occurred after 7 days; (ii) Photo of GO in D.I. water, with good solubility.

**Table S1.** The formation of precipitation: ‘+’ represents ‘obvious precipitation’ and ‘-’ represents ‘no visible precipitation’.

| $C_{GO}$ mg/L | 10-15mg/L |    |    |    | 100-150 mg/L |     |     |     |
|---------------|-----------|----|----|----|--------------|-----|-----|-----|
|               | 5         | 10 | 15 | 20 | 100          | 150 | 200 | 250 |
| MB            | +         | +  | +  | +  | +            | +   | +   | +   |
| NR            | +         | +  | +  | +  | +            | +   | +   | +   |
| MG            | -         | -  | -  | -  | +            | +   | +   | +   |
| Rh B          | -         | -  | -  | -  | +            | +   | +   | +   |
